# Supplementary material for: High photocurrent in oligo-thienylenevinylene-based small molecule solar cells with 4.9% solar-to-electrical energy conversion
Source: Royal Society of Chemistry journal article supplement (doi:10.1039/c5ta01632k), 2015-01-01
Supplement: c5ta01632k1.pdf [file c5ta01632k1.pdf]

## Supporting information

### High Photocurrent in Oligo-thienylenevinylene-Based Small Molecule Solar Cells with 4.9% Solar-to-Electrical Energy Conversion.

Núria F. Montcada <sup>a†</sup>, Rocío Domínguez <sup>b†</sup>, Beatriz Pelado <sup>b</sup>, Pilar de la Cruz <sup>b</sup>, Emilio Palomares <sup>a,c\*</sup>, Fernando Langa <sup>b\*</sup>.

<sup>a</sup>Institute of Chemical Research of Catalonia (ICIQ), Avinguda del Països Catalans 16, 43007 Tarragona, Spain. Fax: +34 977 920 823; Tel: +34 977 920 200; E-mail: [epalomares@iciq.es](mailto:epalomares@iciq.es)

<sup>b</sup>Institute for Nanoscience, Nanotechnology and Molecular Materials (INAMOL). University of Castilla-la Mancha, Campus de la Fábrica. 45071. Toledo, Spain.

<sup>c</sup>Catalan Institution for Research and Advanced Studies (ICREA), Passeig de Lluís Companys 23, 08010 Barcelona, Spain

#### Table of contents

|                                                                          |            |
|--------------------------------------------------------------------------|------------|
| <b>1.- Experimental conditions</b>                                       | <b>S2</b>  |
| <b>2.- <sup>1</sup>H NMR, <sup>13</sup>C NMR, IR and MS spectra</b>      | <b>S4</b>  |
| <b>3.- Thermogravimetric analysis of smL04-smL06</b>                     | <b>S16</b> |
| <b>4.- Differential scanning calorimetry analysis of smL01 and smL06</b> | <b>S17</b> |
| <b>5.- Square Wave plots of smL01-smL06</b>                              | <b>S18</b> |
| <b>6.- Theoretical calculations</b>                                      | <b>S21</b> |
| <b>7.- Absorption spectra of pristine thin films.</b>                    | <b>S23</b> |
| <b>8.- Device optimization</b>                                           | <b>S24</b> |
| <b>9.- Mobility measurements</b>                                         | <b>S25</b> |

## 1.- Experimental conditions

Synthetic procedures were carried out under inert argon atmosphere, in dry solvent unless otherwise noted. All reagents and solvents were reagent grade and were used without further purification. Chromatographic purifications were performed using silica gel 60 SDS (particle size 0.040-0.063 mm). Analytical thin-layer chromatography was performed using Merck TLC silica gel 60 F254. <sup>1</sup>H NMR spectra were obtained on Bruker TopSpin AV-400 (400 MHz) spectrometer. Chemical shifts are reported in parts per million (ppm) relative to the solvent residual peak (CDCl<sub>3</sub>, 7.27 ppm). <sup>13</sup>C NMR chemical shifts are reported relative to the solvent residual peak (CDCl<sub>3</sub>, 77.00 ppm). UV-Vis measurements were carried out on a Shimadzu UV 3600 spectrophotometer. For extinction coefficient determination, solutions of different concentration were prepared in CH<sub>2</sub>Cl<sub>2</sub>, HPLC grade, with absorption between 0.1-1 of absorbance using a 1 cm UV cuvette. The emission measurements were carried out on Cary Eclipse fluorescence spectrophotometer. Mass spectra (MALDI-TOF) were recorded on a VOYAGER DE<sup>TM</sup> STR mass spectrometer using dithranol as matrix. Melting points are uncorrected. Cyclic voltammetry was performed in o-dichlorobenzene/acetonitrile 4:1 solutions. Tetrabutylammonium perchlorate (0.1 M as supporting electrolyte) were purchased from Acros and used without purification. Solutions were deoxygenated by argon bubbling prior to each experiment which was run under argon atmosphere. Experiments were done in a one-compartment cell equipped with a glassy carbon working electrode ( $\varnothing = 2$  mm) and a platinum wire counter electrode. An Ag/AgNO<sub>3</sub> (0.01 M in the supporting electrolyte) electrode was used as reference and checked against the ferrocene/ferrocenium couple (Fc/Fc<sup>+</sup>) before and after each experiment.

The thermogravimetric analysis was performed using a TGA/DSC Linea Excellent instrument by Mettler-Toledo, collected under inert atmosphere of nitrogen, with a rate of 10°C min<sup>-1</sup>, and the weight changes were recorded as a function of temperature. The differential scanning calorimetry analysis was performed by a DSC Linea Excellent instrument by Mettler-Toledo, collected under inert atmosphere of nitrogen at a heating rate of 20 K/min and a cooling rate of 10 K/min.

The molecular geometries and frontier molecular orbitals of these new dyes have been optimized by density functional theory (DFT) calculations at the B3LYP/6-31G\* level.<sup>1</sup>

---

<sup>1</sup> Gaussian 03, Revision D.02, Frisch, M. J.; Trucks, G. W.; Schlegel, H. B.; Scuseria, G. E.; Robb, M. A.;

## 2.- $^1\text{H}$ NMR, $^{13}\text{C}$ NMR, IR spectra and MS spectra.

---

Cheeseman, J. R.; Montgomery Jr., J. A.; Vreven, T.; Kudin, K. N.; Burant, J. C.; Millam, J. M.; Iyengar, S. S.; Tomasi, J.; Barone, V.; Mennucci, B.; Cossi, M.; Scalmani, G.; Rega, N.; Petersson, G. A.; Nakatsuji, H.; Hada, M.; Ehara, M.; Toyota, K.; Fukuda, R.; Hasegawa, J.; Ishida, M.; Nakajima, T.; Honda, Y.; Kitao, O.; Nakai, H.; Klene, M.; Li, X.; Knox, J. E.; Hratchian, H. P.; Cross, J. B.; Bakken, V.; Adamo, C.; Jaramillo, J.; Gomperts, R.; Stratmann, R. E.; Yazyev, O.; Austin, A. J.; Cammi, R.; Pomelli, C.; Ochterski, J. W.; Ayala, P. Y.; Morokuma, K.; Voth, G. A.; Salvador, P.; Dannenberg, J. J.; Zakrzewski, V. G.; Dapprich, S.; Daniels, A. D.; Strain, M. C.; Farkas, O.; Malick, D. K.; Rabuck, A. D.; Raghavachari, K.; Foresman, J. B.; Ortiz, J. V.; Cui, Q.; Baboul, A. G.; Clifford, S.; Cioslowski, J.; Stefanov, B. B.; Liu, G.; Liashenko, A.; Piskorz, P.; Komaromi, I.; Martin, R. L.; Fox, D. J.; Keith, T.; Al-Laham, M. A.; Peng, C. Y.; Nanayakkara, A.; Challacombe, M.; Gill, P. M. W.; Johnson, B.; Chen, W.; Wong, M. W.; Gonzalez, C.; Pople, J. A. Gaussian, Inc., Wallingford CT, 2004.

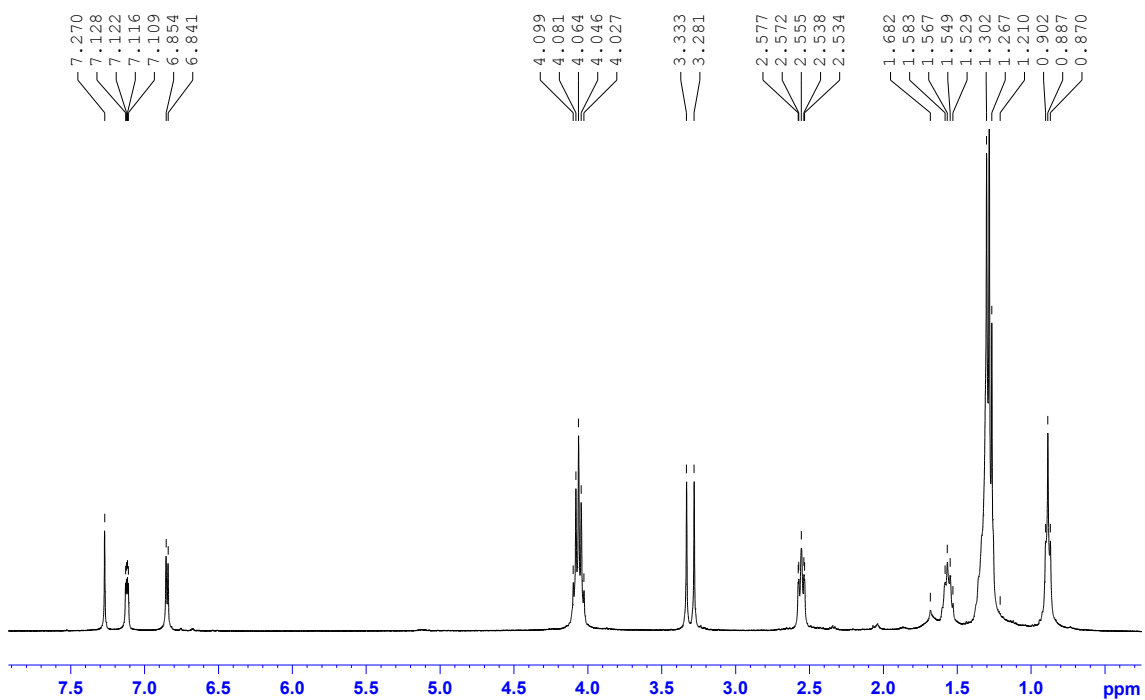

**Figure S1.**  $^1\text{H}$  NMR spectrum (400 MHz,  $\text{CDCl}_3$ ) of **3**.

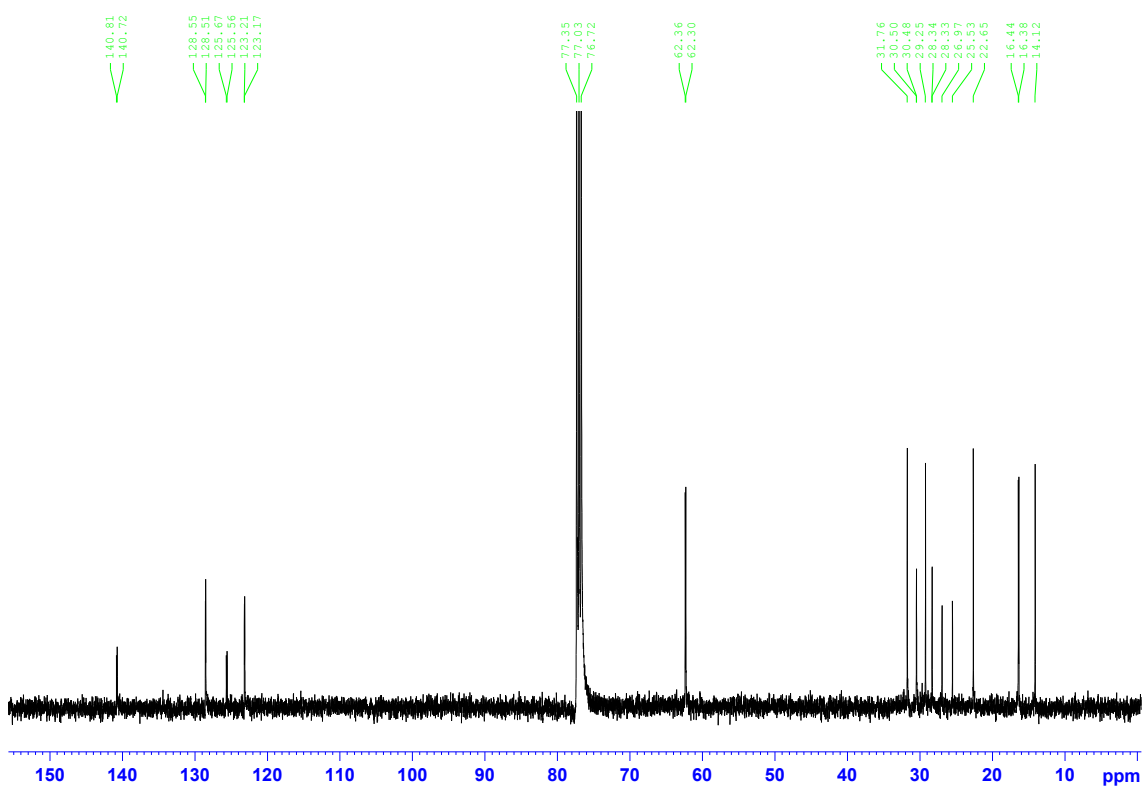

**Figure S2.**  $^{13}\text{C}$  NMR spectrum (100 MHz,  $\text{CDCl}_3$ ) of **3**.

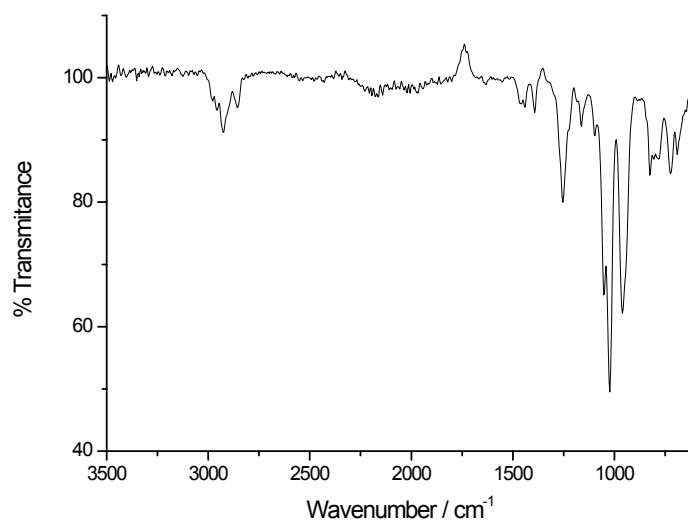

**Figure S3.** FT-IR spectrum of **3**.

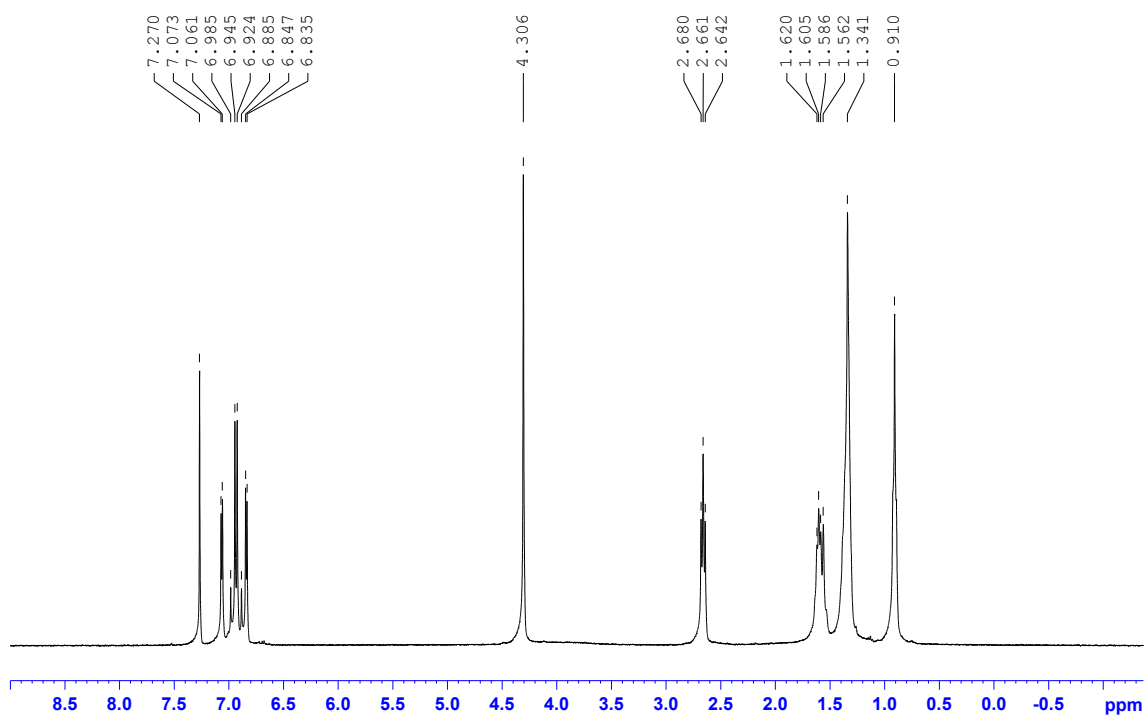

**Figure S4.**  $^1\text{H}$  NMR spectrum (400 MHz,  $\text{CDCl}_3$ ) of **4**.

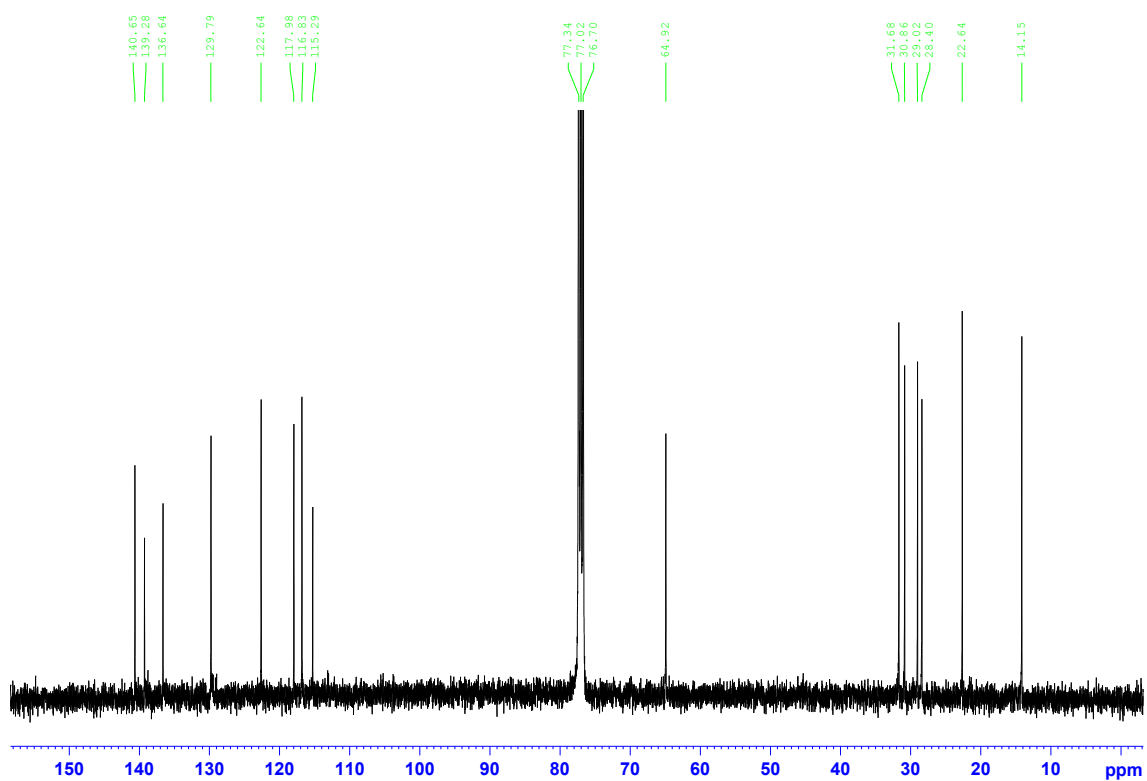

**Figure S5.**  $^{13}\text{C}$  NMR spectrum (100 MHz,  $\text{CDCl}_3$ ) of **4**.

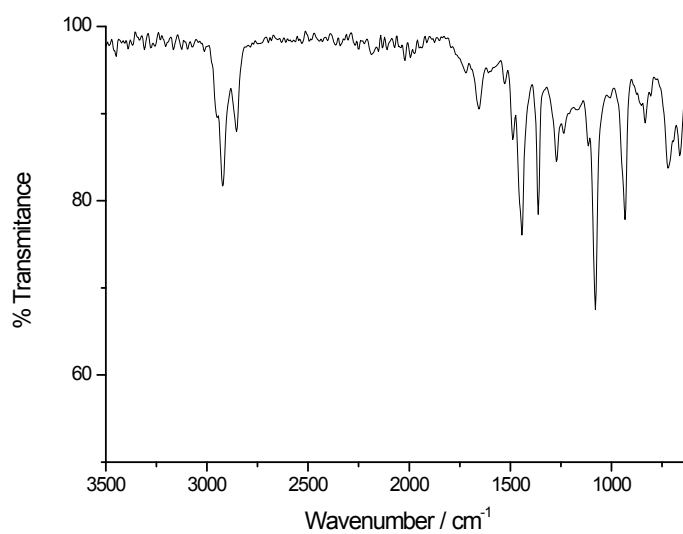

**Figure S6.** FT-IR spectrum of **4**.

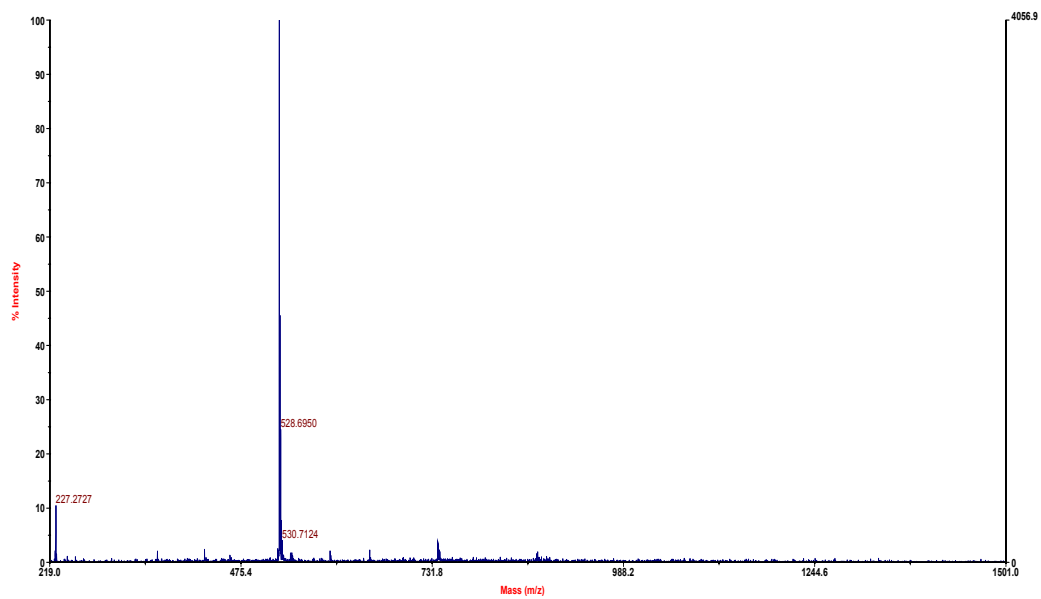

Figure S7. MALDI-MS spectrum of **4** (Matrix: Dithranol).

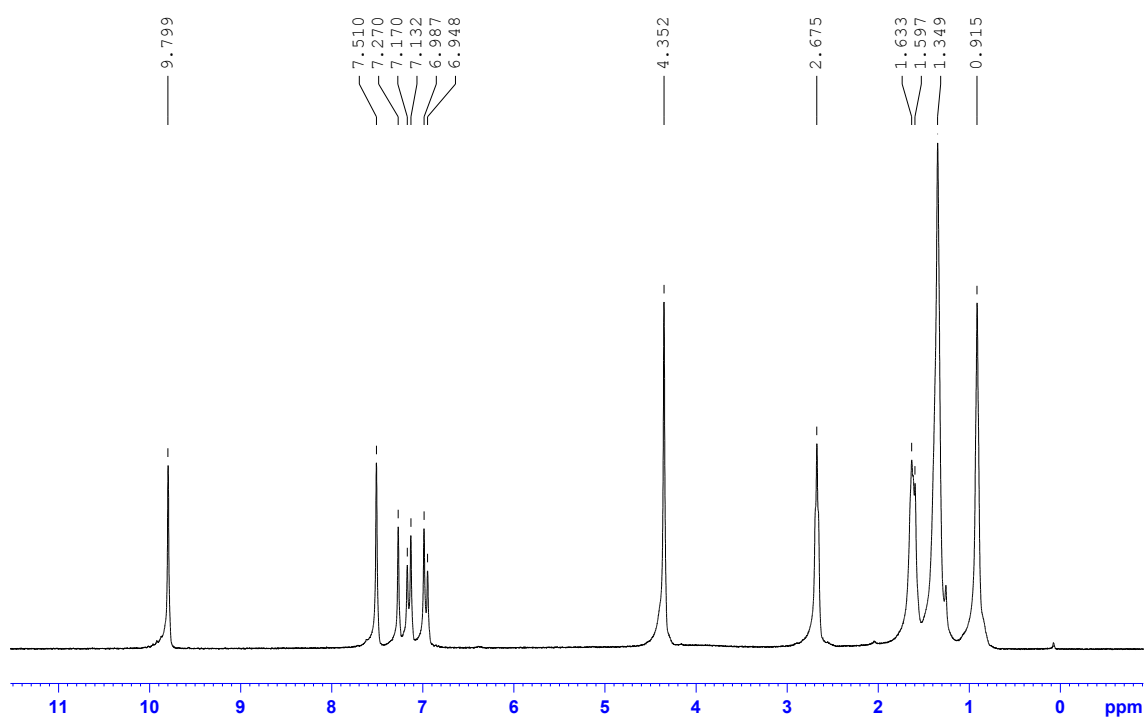

Figure S8.  $^1\text{H}$  NMR spectrum (400 MHz,  $\text{CDCl}_3$ ) of **5a**.

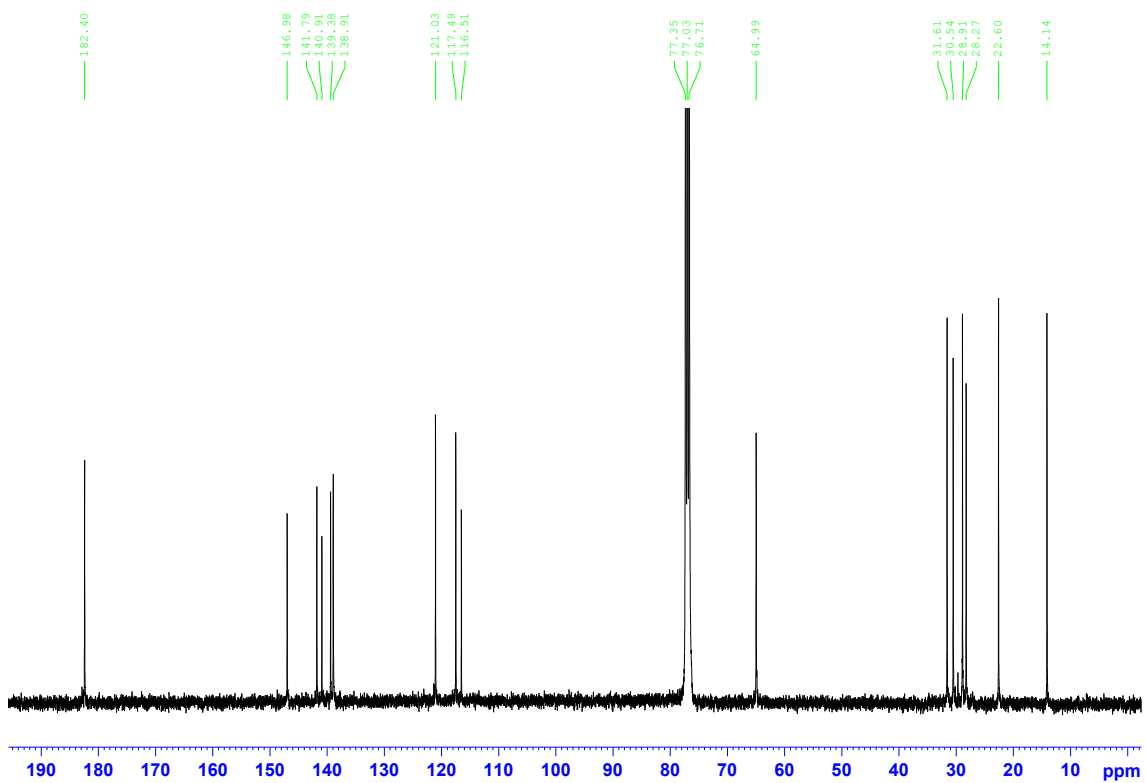

**Figure S9.**  $^{13}\text{C}$  NMR spectrum (100 MHz,  $\text{CDCl}_3$ ) of **5a**.

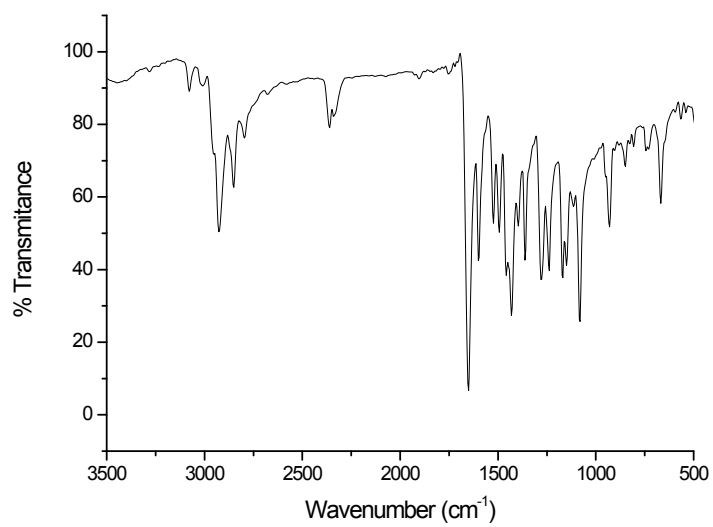

**Figure S10.** FT-IR spectrum of **5a**.



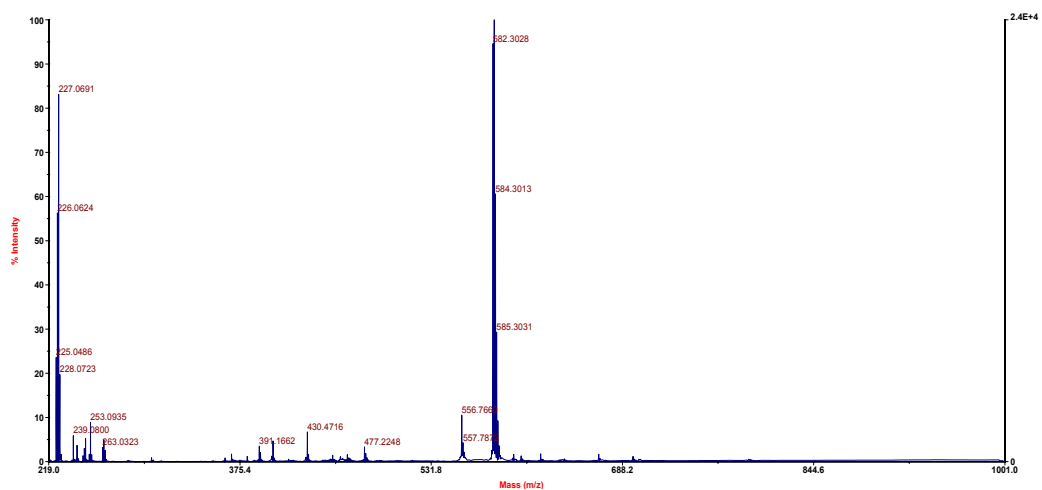

Figure S11. MALDI-MS spectrum of **5a** (Matrix: Dithranol).

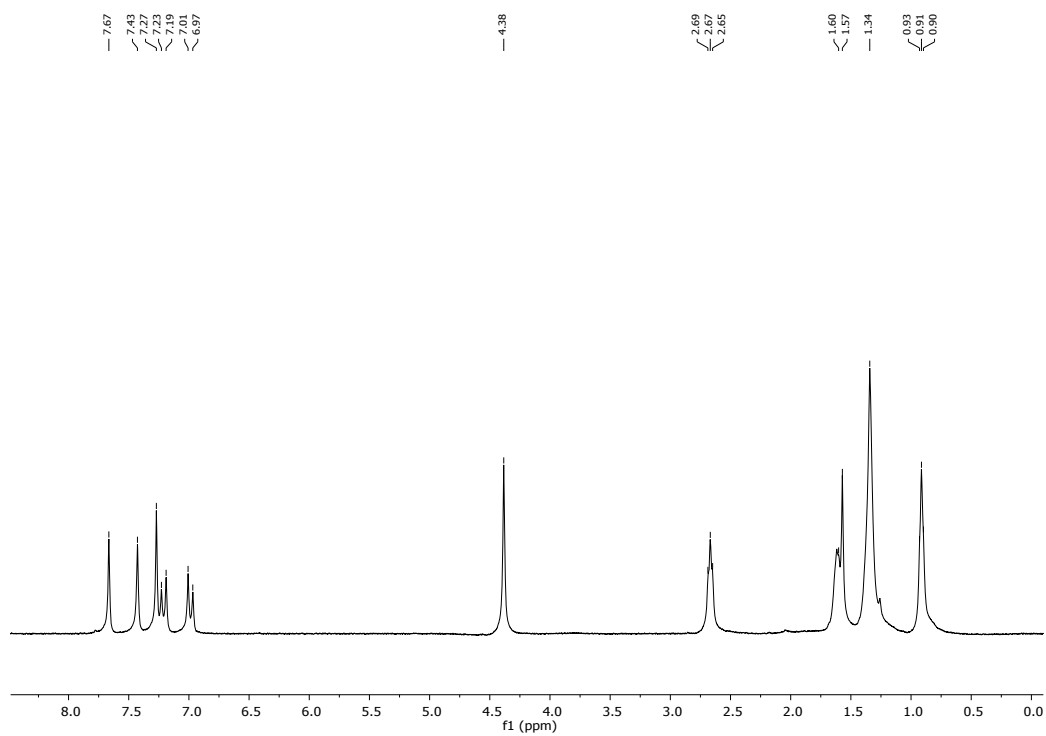

Figure S12.  $^1\text{H}$  NMR spectrum (400 MHz,  $\text{CDCl}_3$ ) of **smL04**.

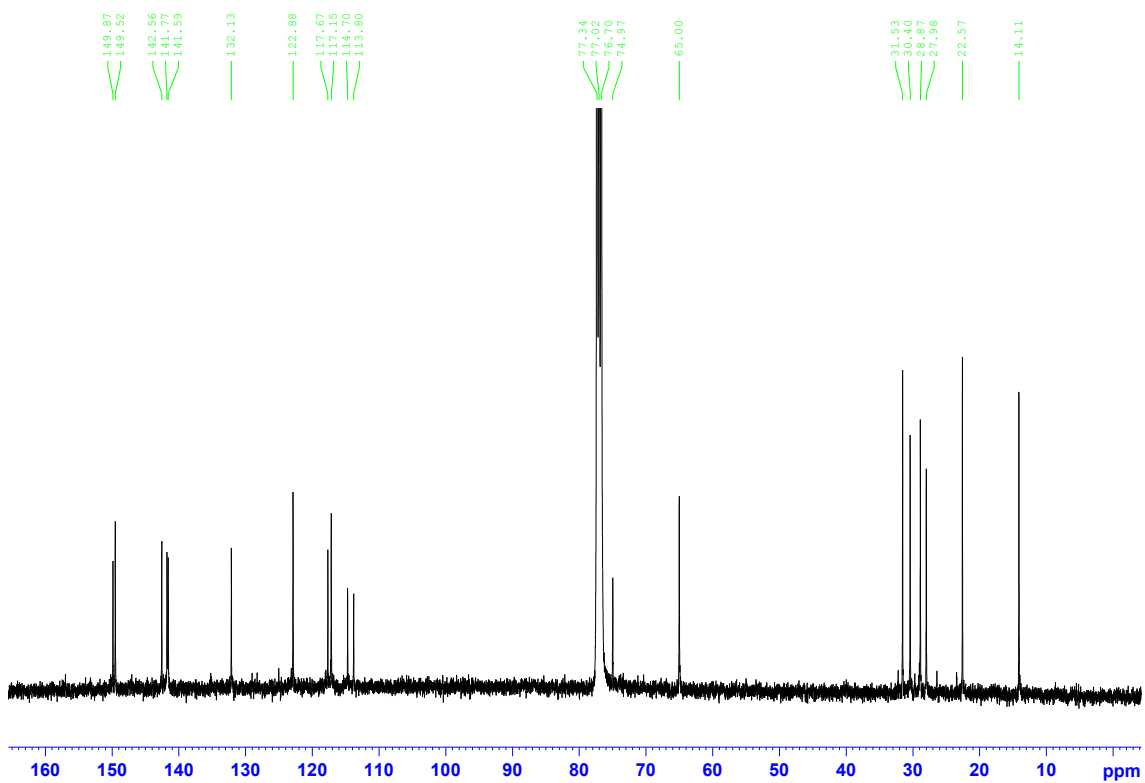

**Figure S13.**  $^{13}\text{C}$  NMR spectrum (100 MHz,  $\text{CDCl}_3$ ) of **smL04**.

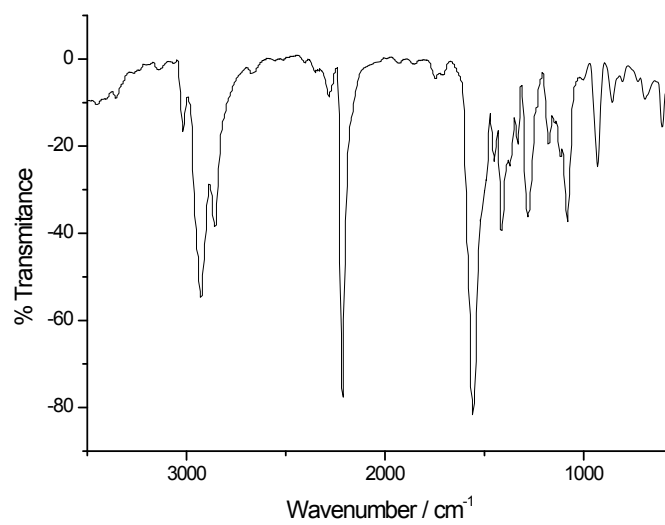

**Figure S14.** FT-IR spectrum of **smL04**.

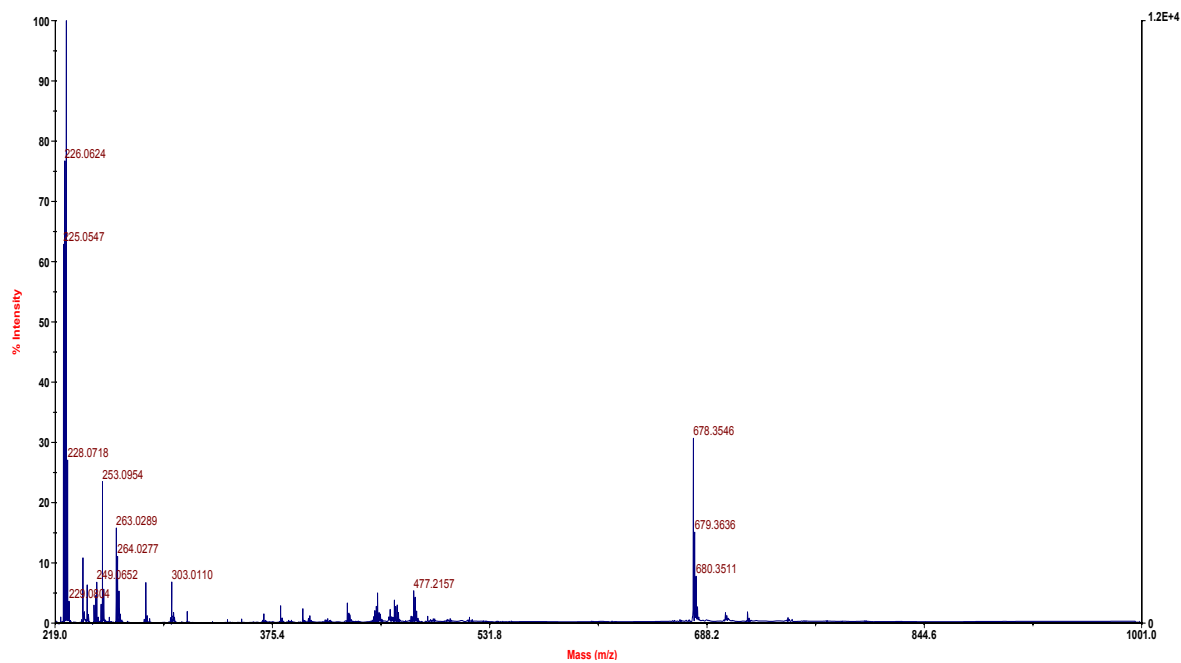

**Figure S15.** MALDI-MS spectrum of **smL04** (Matrix: Dithranol).

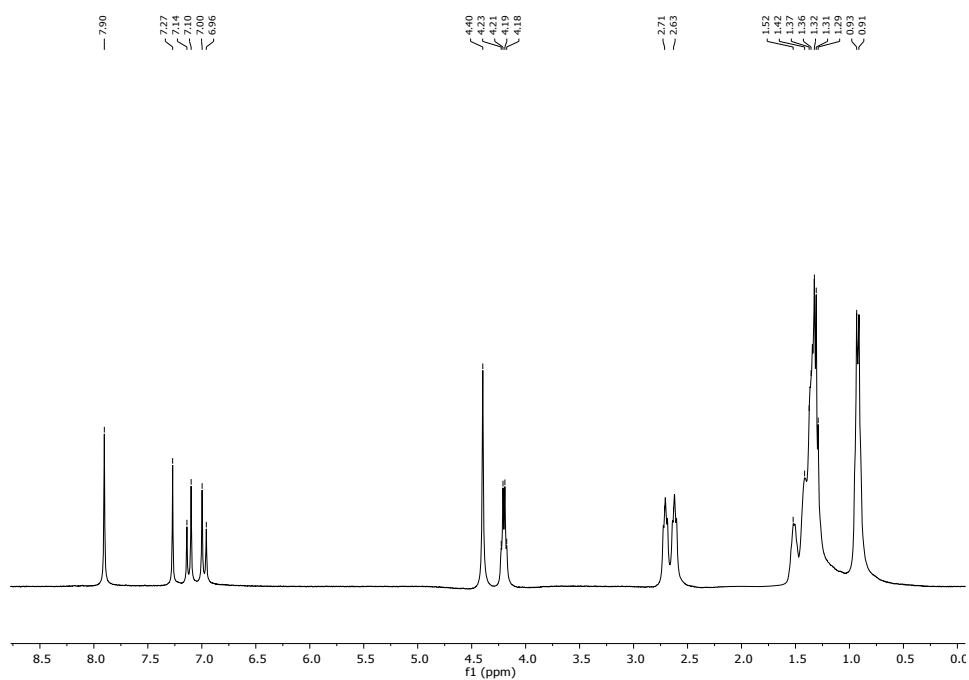

Figure S16.  $^1\text{H}$  NMR spectrum (400 MHz,  $\text{CDCl}_3$ ) of smL05.

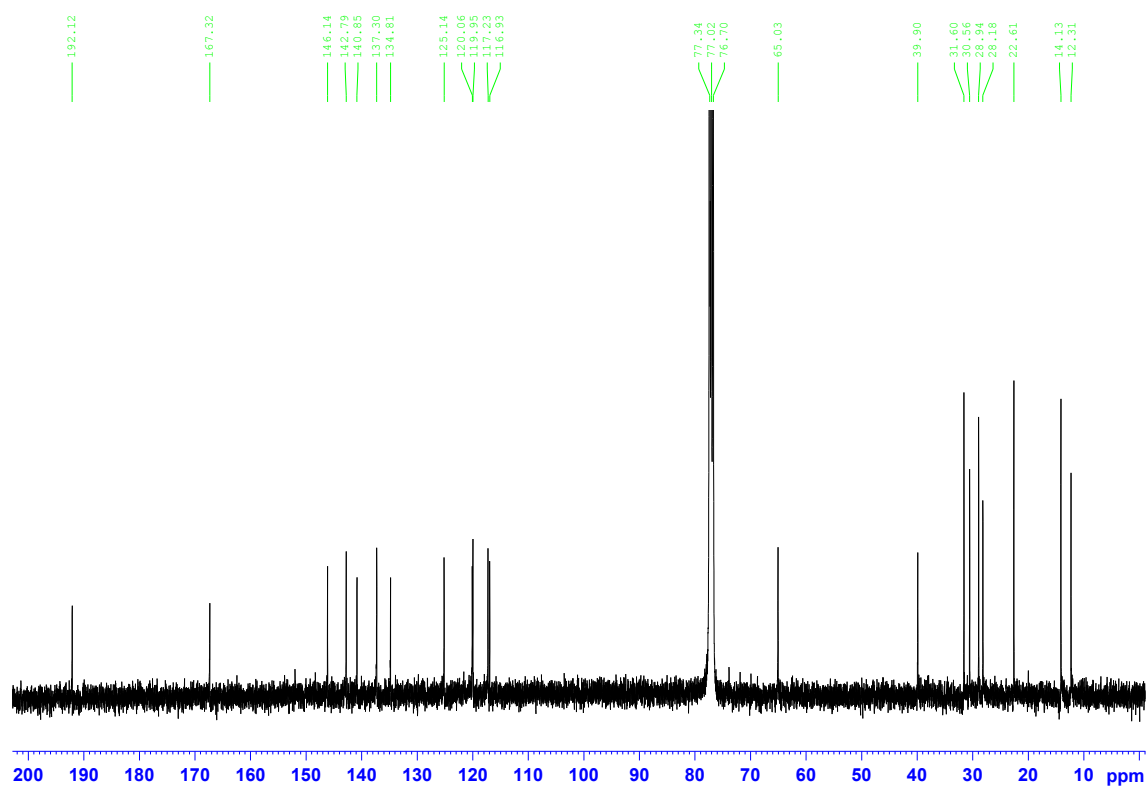

Figure S17.  $^{13}\text{C}$  NMR spectrum (100 MHz,  $\text{CDCl}_3$ ) of smL05.

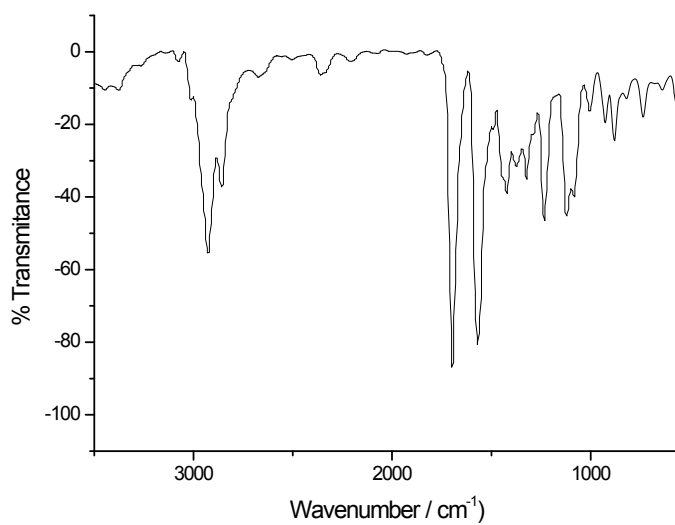

**Figure S18.** FT-IR spectrum of **smL05**.

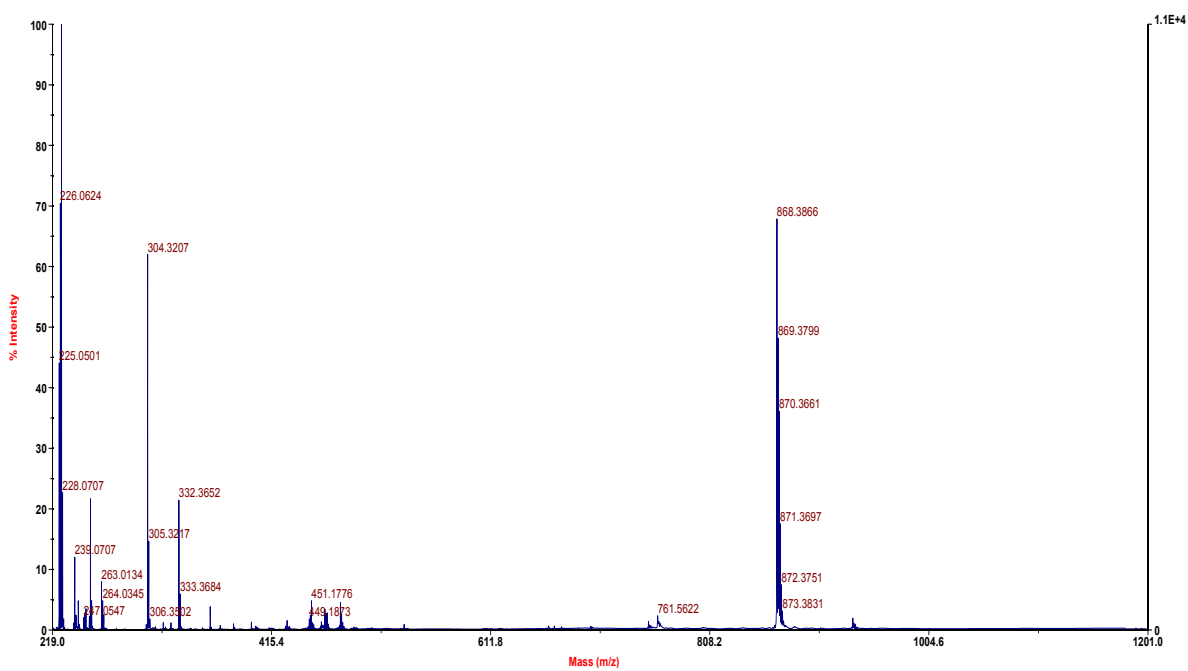

**Figure S19.** MALDI-MS spectrum of **smL05** (Matrix: Dithranol).

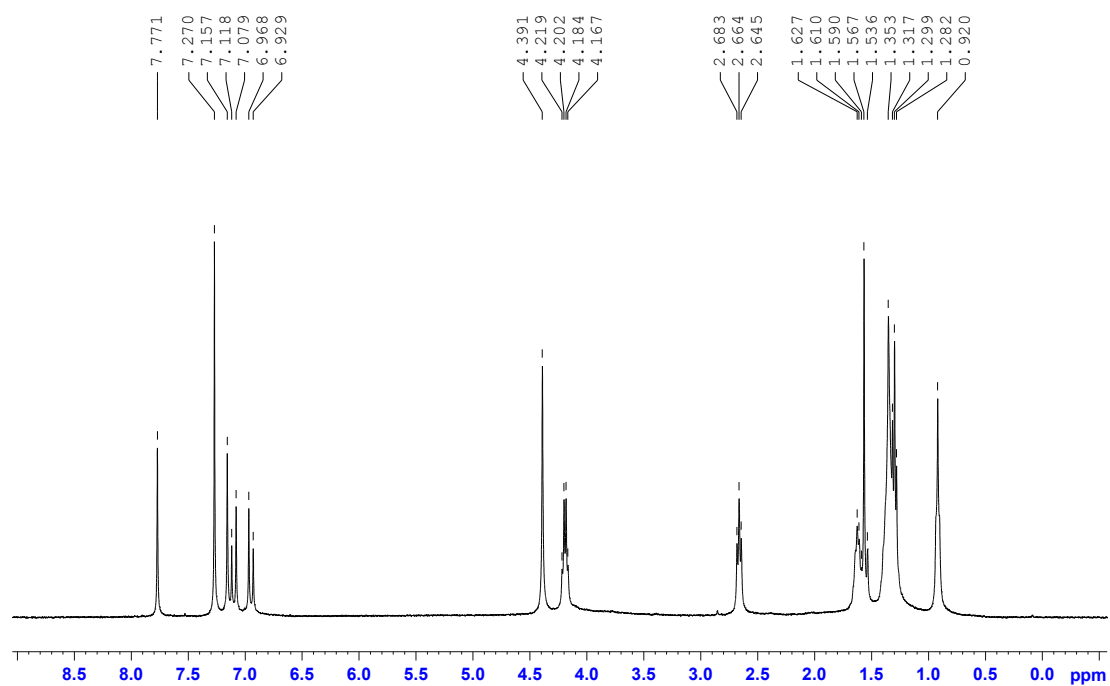

Figure S20.  $^1\text{H}$  NMR spectrum (400 MHz,  $\text{CDCl}_3$ ) of smL06.

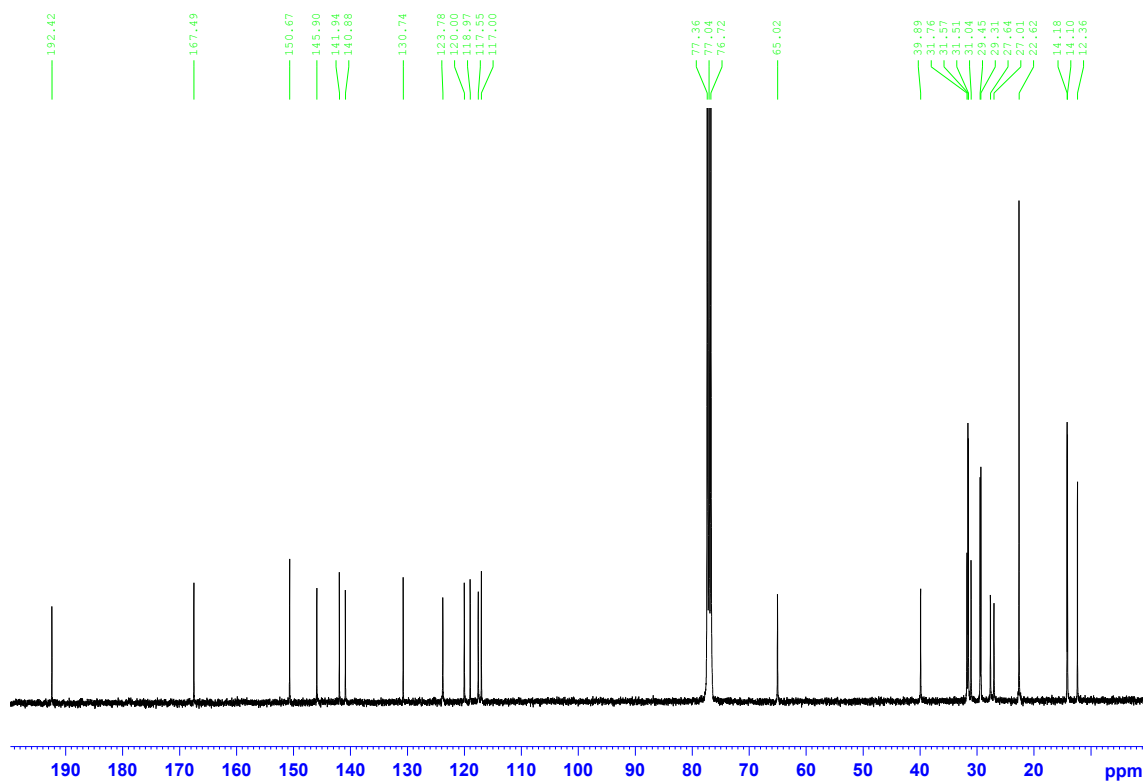

Figure S21.  $^{13}\text{C}$  NMR spectrum (100 MHz,  $\text{CDCl}_3$ ) of smL06.

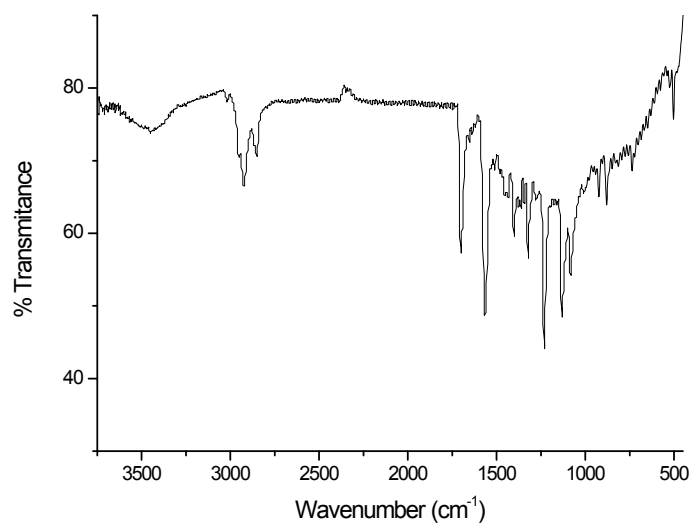

**Figure S22.** FT-IR spectrum of **smL06**.

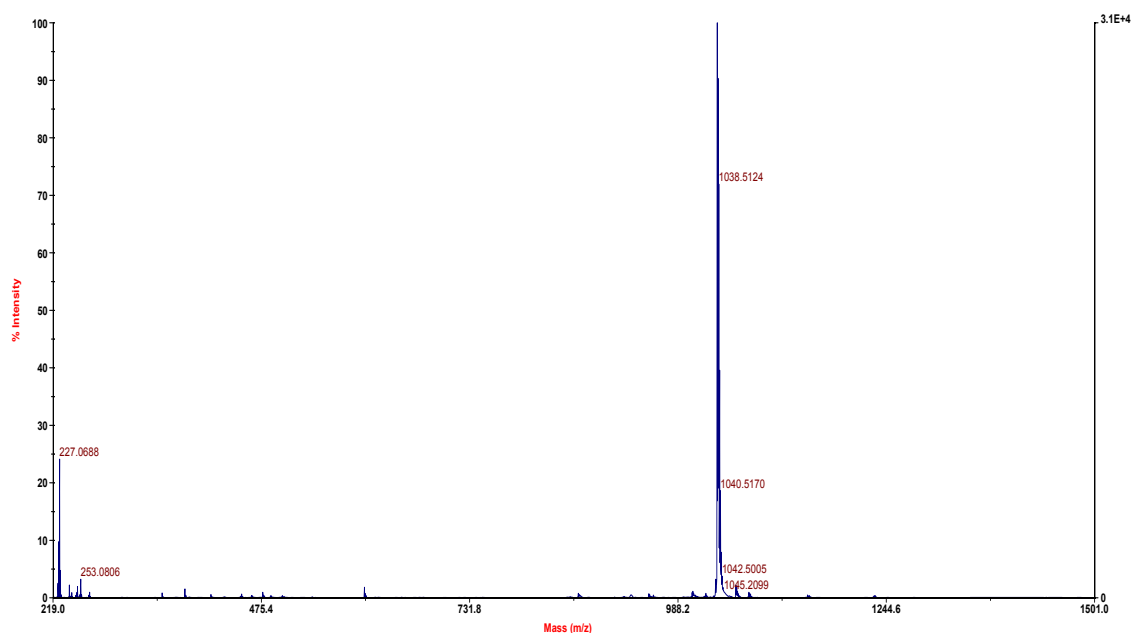

**Figure S23.** MALDI-MS spectrum of **smL06** (Matrix: Dithranol).

### 3.- Thermogravimetric analysis of smL04-smL06

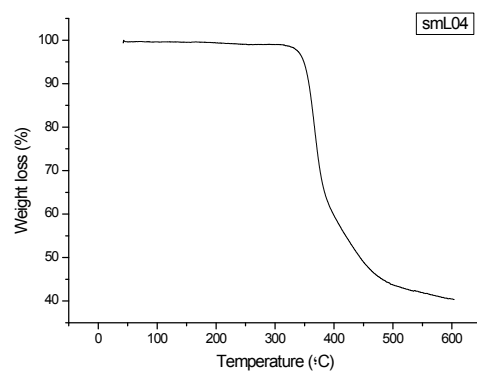

Figure S24. Thermogravimetric analysis of smL04.

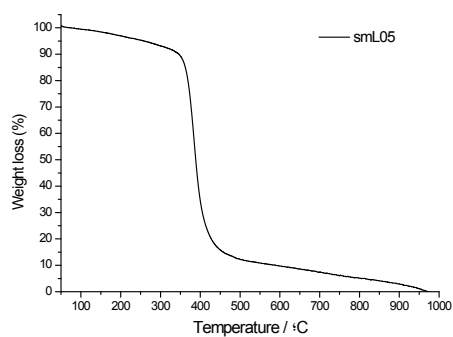

Figure S25. Thermogravimetric analysis of smL05.

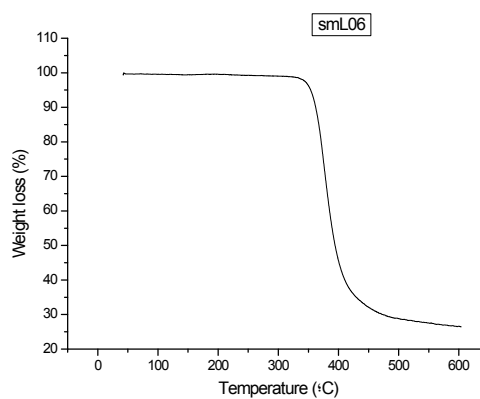

Figure S26. Thermogravimetric analysis of smL06.



#### 4.- Differential Scanning Calorimetry (DSC) analysis of smL01 and smL06

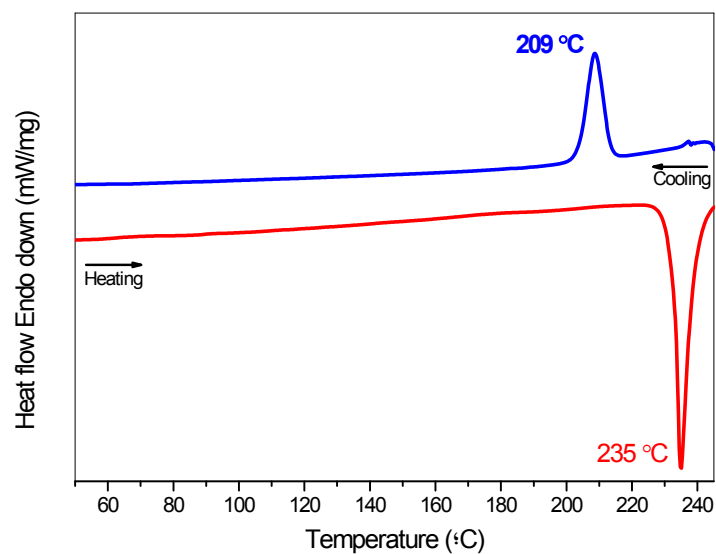

Figure S27. DSC analysis of smL01.

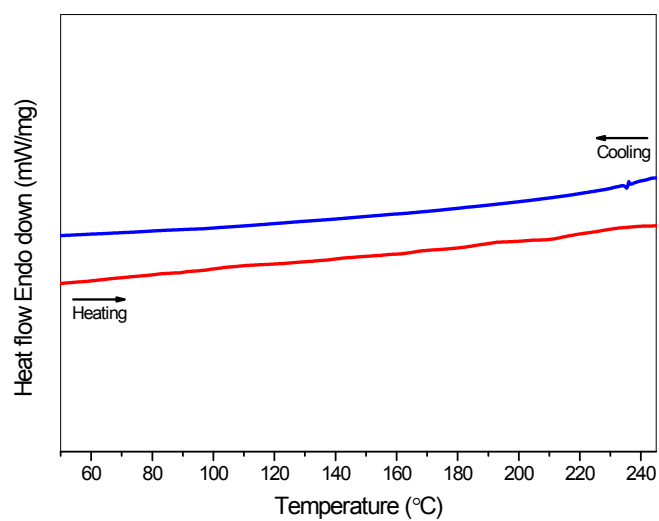

Figure S28. DSC analysis of smL06.

**5.- Square wave plots of smL01-06.**

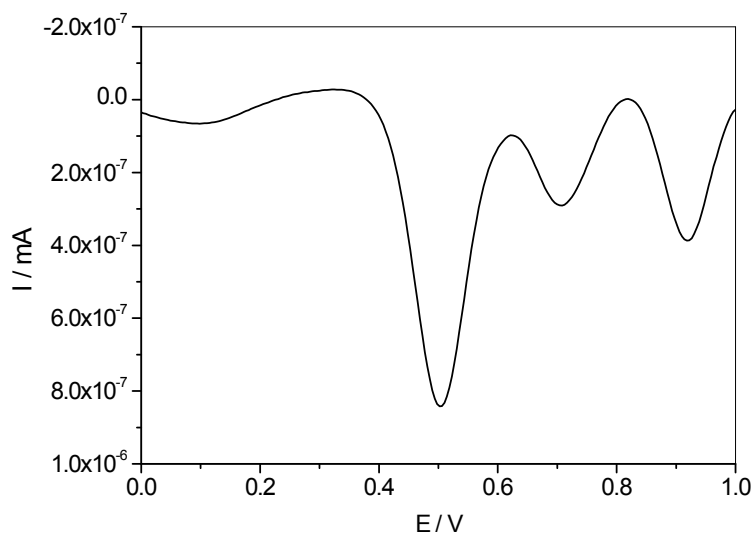

**Figure S29.** Square Wave Voltammetry plot of **smL01** (referred to Fc/Fc<sup>+</sup>).

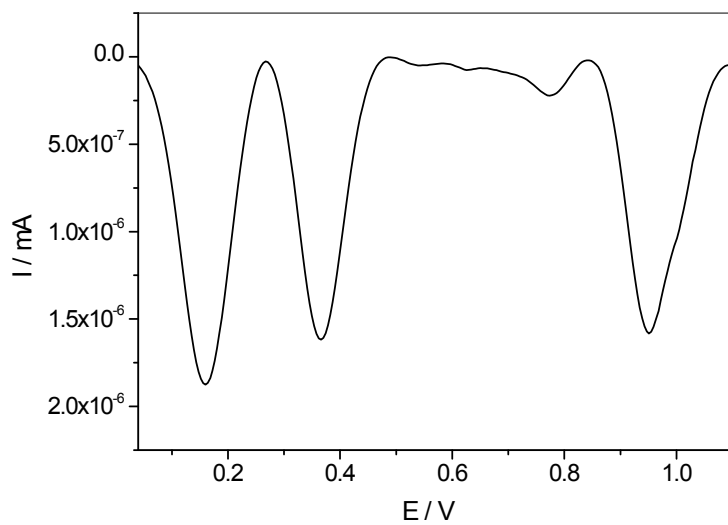

**Figure S30.** Square Wave Voltammetry plot of **smL02** (referred to Fc/Fc<sup>+</sup>).

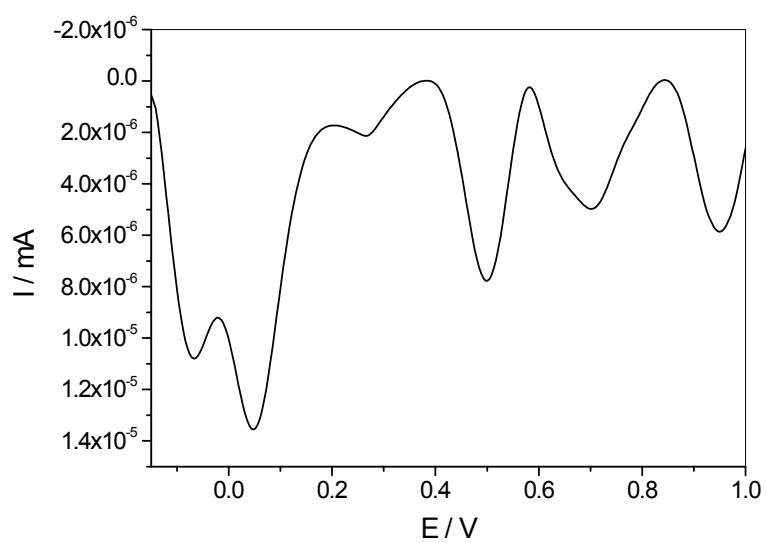

**Figure S31.** Square Wave Voltammetry plot of **smL03** (referred to  $\text{Fc}/\text{Fc}^+$ ).

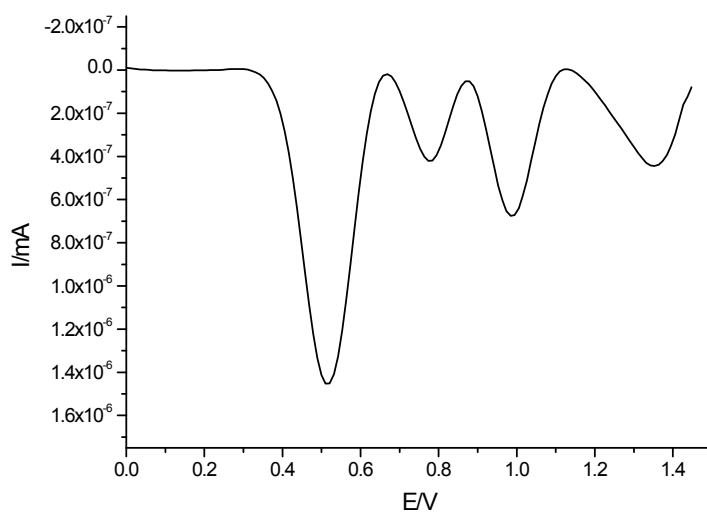

**Figure S32.** Square Wave Voltammetry plot of **smL04** (referred to  $\text{Fc}/\text{Fc}^+$ ).

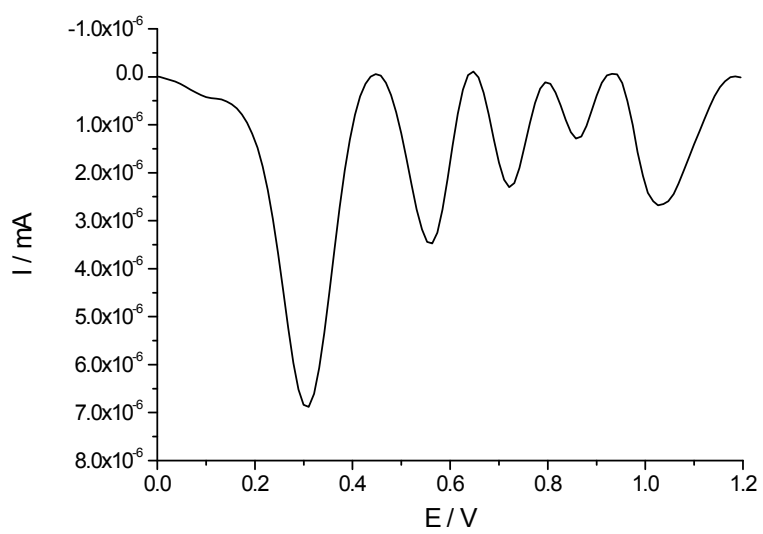

**Figure S33.** Square Wave Voltammetry plot of **smL05** (referred to  $\text{Fc}/\text{Fc}^+$ ).

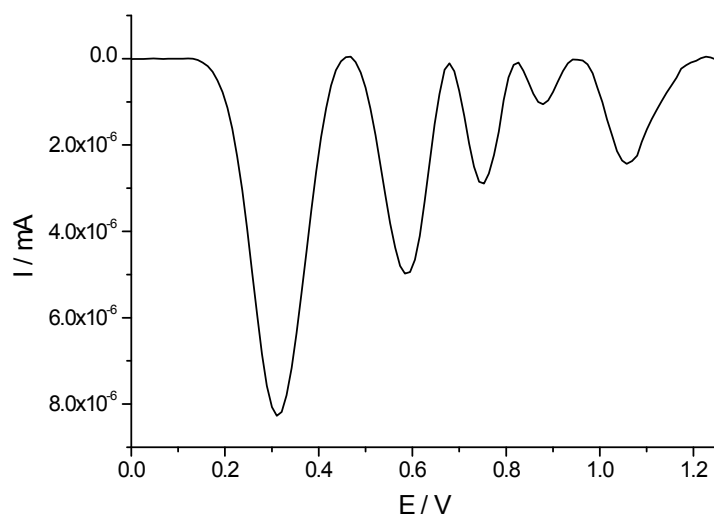

**Figure S34.** Square Wave Voltammetry plot of **smL06** (referred to  $\text{Fc}/\text{Fc}^+$ ).

## 6.- Theoretical calculations.

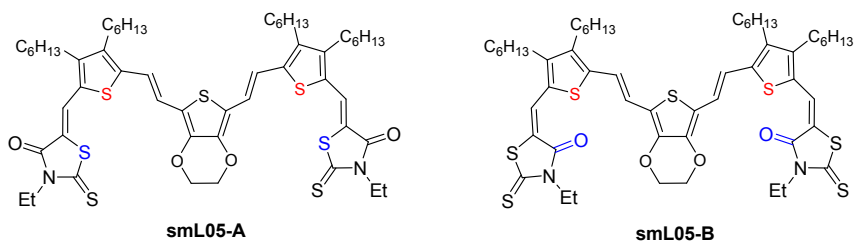

Scheme S1. Possible configurations of **smL05**.

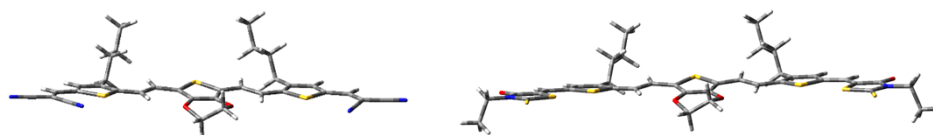

Figure S35. More stable geometries for **smL04** (left) and **smL06** (right).

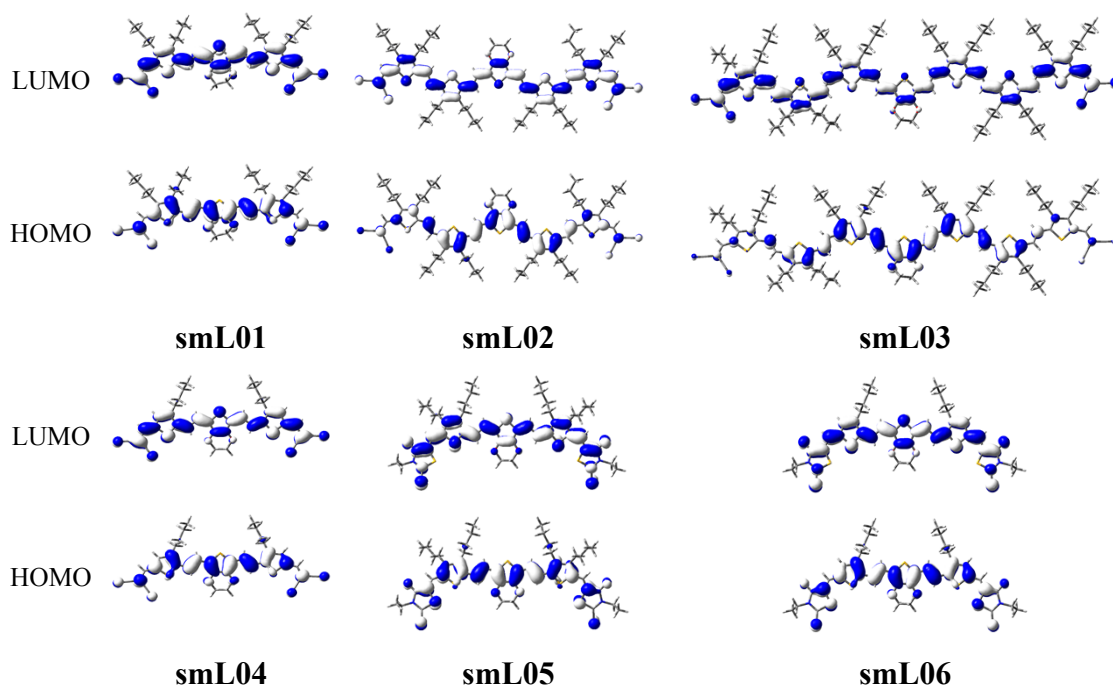

Figure S36. Distribution of orbital coefficients of HOMO and LUMO of compounds **smL01-smL06**.

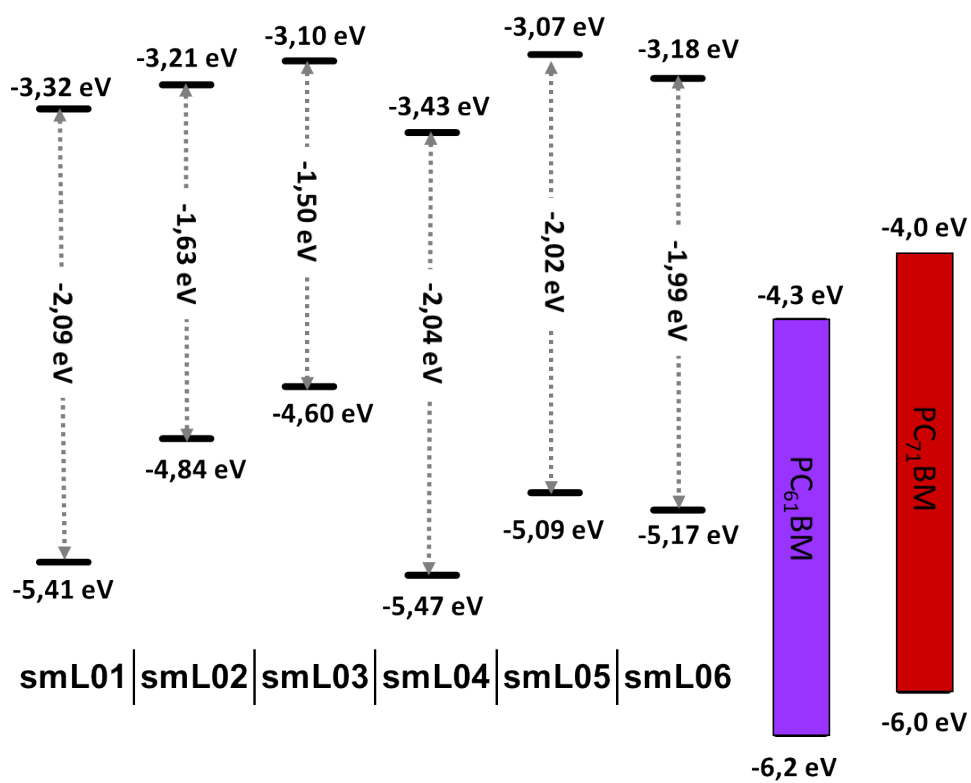

**Figure S37.** Theoretical HOMO and LUMO energy levels of **smL01-06** related to PC<sub>61</sub>BM and PC<sub>71</sub>BM.

## 7.- Absorption spectra of pristine thin films.

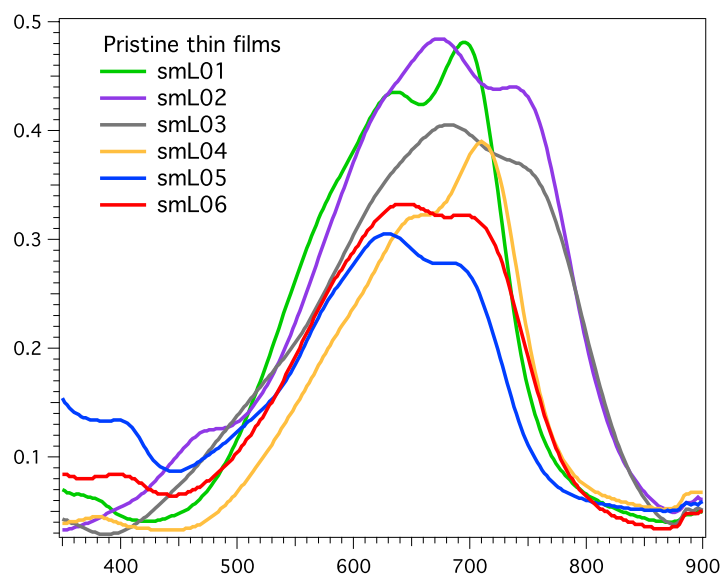

**Figure S38.** Absorption spectra of smL01-06 pristine thin films using same concentration as in blended films.

## 8.- Device optimization.

**Table S1.** Device performance parameters for different optimization processes.

| smL01:PC <sub>70</sub> BM Device characteristics |                |              | Device performance parameters         |                      |        |         |
|--------------------------------------------------|----------------|--------------|---------------------------------------|----------------------|--------|---------|
| w/w ratio                                        | Thickness (nm) | SVA time (s) | J <sub>sc</sub> (mA/cm <sup>2</sup> ) | V <sub>oc</sub> (mV) | FF (%) | PCE (%) |
| 1:1                                              | 75             | 0            | 5.46                                  | 1010                 | 63.70  | 3.51    |
|                                                  |                | 60           | 5.85                                  | 1010                 | 63.05  | 3.85    |
|                                                  |                | 180          | 2.95                                  | 989                  | 53.93  | 1.57    |
|                                                  |                | 420          | 1.07                                  | 935                  | 44.26  | 0.44    |
|                                                  | 60             | 60           | 4.20                                  | 1030                 | 60.20  | 2.61    |
|                                                  | 100            | 60           | 4.36                                  | 1020                 | 56.47  | 2.51    |
| 2:1                                              | 75             | 60           | 3.90                                  | 1030                 | 57.93  | 2.34    |
| 1:2                                              | 76             | 60           | 3.08                                  | 1030                 | 51.85  | 1.57    |

**Table S2.** IV performance parameters of optimized smL:PC<sub>70</sub>BM complete devices with and without solvent annealing post-treatment.

| Device      | J <sub>sc</sub> (mA cm <sup>-2</sup> ) | V <sub>oc</sub> (mV) | FF (%) | PCE (%) |
|-------------|----------------------------------------|----------------------|--------|---------|
| smL01 SVA   | 5.85                                   | 1.01                 | 63.70  | 3.75    |
| smL01 non-A | 5.32                                   | 984                  | 61.25  | 3.18    |
| smL02 SVA   | 3.78                                   | 613                  | 66.43  | 1.54    |
| smL02 non-A | 3.08                                   | 638                  | 55.67  | 1.09    |
| smL03 SVA   | 2.70                                   | 562                  | 52.61  | 0.80    |
| smL03 non-A | 2.93                                   | 568                  | 51.54  | 0.86    |
| smL04 SVA   | 2.50                                   | 924                  | 45.43  | 1.05    |
| smL04 non-A | 2.30                                   | 914                  | 47.76  | 1.01    |
| smL05 SVA   | 4.70                                   | 910                  | 34.91  | 1.50    |
| smL05 non-A | 3.85                                   | 920                  | 30.34  | 1.08    |
| smL06 SVA   | 11.98                                  | 890                  | 45.69  | 4.85    |
| smL06 non-A | 4.59                                   | 900                  | 32.27  | 1.33    |



## 9.- Mobility measurements.

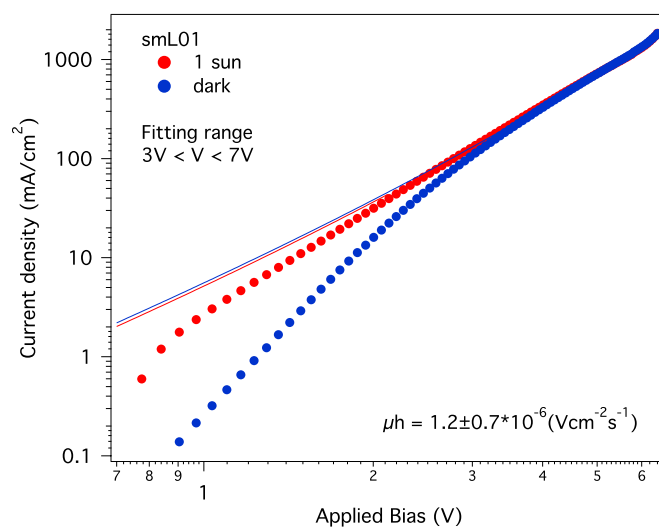

**Figure S39.** Hole only smL01/PC<sub>70</sub>BM device *I-V* curve at SCLC region.

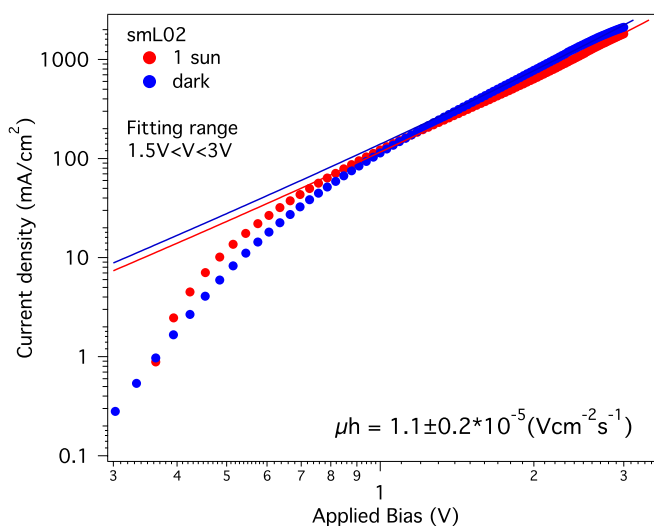

**Figure S40.** Hole only smL02/PC<sub>70</sub>BM device *I-V* curve at SCLC region.

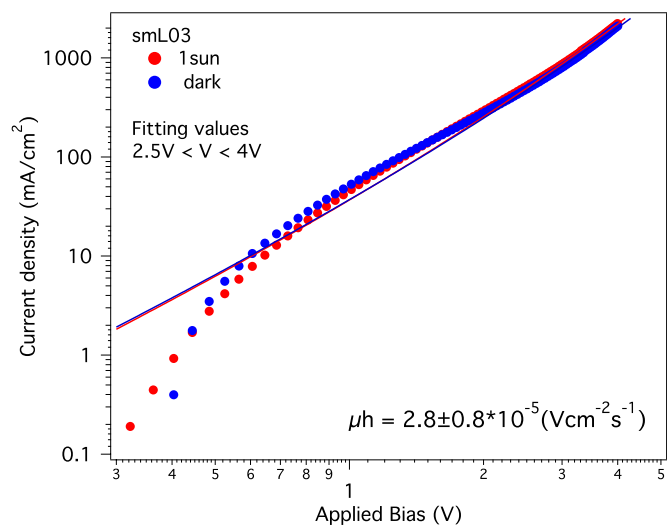

**Figure S41.** Hole only smL03/PC<sub>70</sub>BM device *I-V* curve at SCLC region.

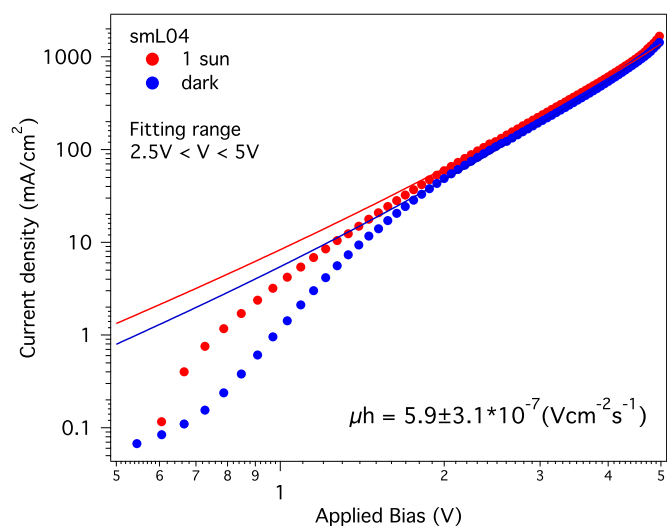

**Figure S42.** Hole only smL04/PC<sub>70</sub>BM device *I-V* curve at SCLC region.

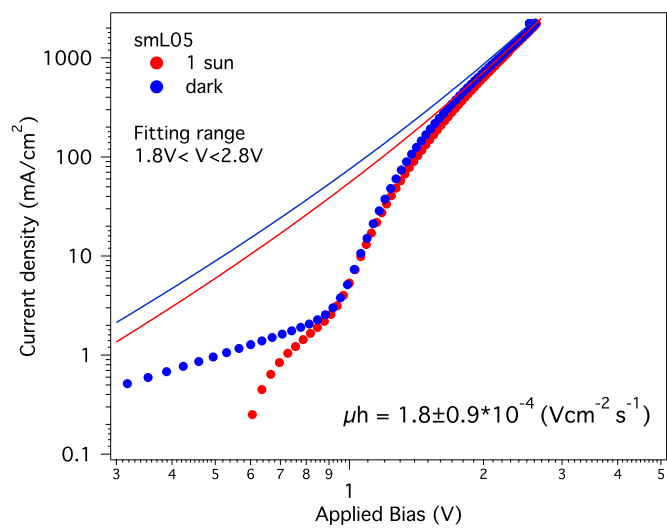

**Figure S43.** Hole only smL05/PC<sub>70</sub>BM device *I-V* curve at SCLC region.
